# Supplementary material for: Clinical, biochemical and metabolic characterization of patients with short-chain enoyl-CoA hydratase(ECHS1) deficiency: two case reports and the review of the literature
Source: Springer Nature journal article supplement (doi:10.1186/s12887-020-1947-z), 2020-02-03
Supplement: MOESM1 [file 17620320]

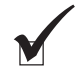

| Topic                           | Item       | Checklist item description                                                                               | Reported on Page                                                    |
|---------------------------------|------------|----------------------------------------------------------------------------------------------------------|---------------------------------------------------------------------|
| <b>Title</b>                    | <b>1</b>   | The words “case report” should be in the title along with the area of focus .....                        | page 3                                                              |
| <b>Key Words</b>                | <b>2</b>   | 2 to 5 key words that identify areas covered in this case report.....                                    | page 3                                                              |
| <b>Abstract</b>                 | <b>3a</b>  | Introduction—What is unique about this case? What does it add to the medical literature? .....           | abstract, page 3                                                    |
|                                 | <b>3b</b>  | The main symptoms of the patient and the important clinical findings .....                               | abstract, page 3                                                    |
|                                 | <b>3c</b>  | The main diagnoses, therapeutics interventions, and outcomes .....                                       | abstract, page 4                                                    |
|                                 | <b>3d</b>  | Conclusion—What are the main “take-away” lessons from this case? .....                                   | abstract, page 4                                                    |
| <b>Introduction</b>             | <b>4</b>   | One or two paragraphs summarizing why this case is unique with references .....                          | background, page 4                                                  |
| <b>Patient Information</b>      | <b>5a</b>  | De-identified demographic information and other patient specific information .....                       | background, page 4                                                  |
|                                 | <b>5b</b>  | Main concerns and symptoms of the patient .....                                                          | case presentation, page 5, 6                                        |
|                                 | <b>5c</b>  | Medical, family, and psychosocial history including relevant genetic information (also see timeline). .. | case presentation, page 5, 6                                        |
|                                 | <b>5d</b>  | Relevant past interventions and their outcomes .....                                                     | case presentation, page 11                                          |
| <b>Clinical Findings</b>        | <b>6</b>   | Describe the relevant physical examination (PE) and other significant clinical findings. ....            | case presentation, page 5, 6                                        |
| <b>Timeline</b>                 | <b>7</b>   | Important information from the patient’s history organized as a timeline .....                           | case presentation, page 5, 6                                        |
| <b>Diagnostic Assessment</b>    | <b>8a</b>  | Diagnostic methods (such as PE, laboratory testing, imaging, surveys). ....                              | case presentation, page 5, 6, 7                                     |
|                                 | <b>8b</b>  | Diagnostic challenges (such as access, financial, or cultural) .....                                     | N/A                                                                 |
|                                 | <b>8c</b>  | Diagnostic reasoning including other diagnoses considered .....                                          | case presentation, page 5, 6, 7                                     |
|                                 | <b>8d</b>  | Prognostic characteristics (such as staging in oncology) where applicable .....                          | discussion page 12                                                  |
| <b>Therapeutic Intervention</b> | <b>9a</b>  | Types of intervention (such as pharmacologic, surgical, preventive, self-care) .....                     | discussion page 11                                                  |
|                                 | <b>9b</b>  | Administration of intervention (such as dosage, strength, duration) .....                                | N/A                                                                 |
|                                 | <b>9c</b>  | Changes in intervention (with rationale) .....                                                           | discussion page 11                                                  |
| <b>Follow-up and Outcomes</b>   | <b>10a</b> | Clinician and patient-assessed outcomes (when appropriate) .....                                         | discussion page 12                                                  |
|                                 | <b>10b</b> | Important follow-up diagnostic and other test results .....                                              | discussion page 12                                                  |
|                                 | <b>10c</b> | Intervention adherence and tolerability (How was this assessed?) .....                                   | N/A                                                                 |
|                                 | <b>10d</b> | Adverse and unanticipated events .....                                                                   | N/A                                                                 |
| <b>Discussion</b>               | <b>11a</b> | Discussion of the strengths and limitations in your approach to this case .....                          | N/A                                                                 |
|                                 | <b>11b</b> | Discussion of the relevant medical literature. ....                                                      | discussion page 11                                                  |
|                                 | <b>11c</b> | The rationale for conclusions (including assessment of possible causes) .....                            | discussion page 12                                                  |
|                                 | <b>11d</b> | The primary “take-away” lessons of this case report .....                                                | discussion page 12                                                  |
| <b>Patient Perspective</b>      | <b>12</b>  | When appropriate the patient should share their perspective on the treatments they received .....        | discussion page 12                                                  |
| <b>Informed Consent</b>         | <b>13</b>  | Did the patient give informed consent? Please provide if requested .....                                 | Yes <input checked="" type="checkbox"/> No <input type="checkbox"/> |
